# Supplementary material
Source: MDPI journal article supplement (https://www.mdpi.com/2073-4433/9/7/268)
Supplement: s1 [file s1]

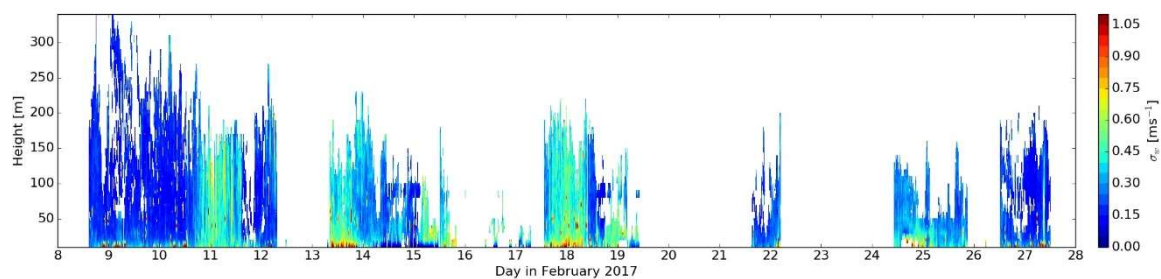

**Figure S1.** SODAR profile time series of  $\overline{\omega'^2}$ .

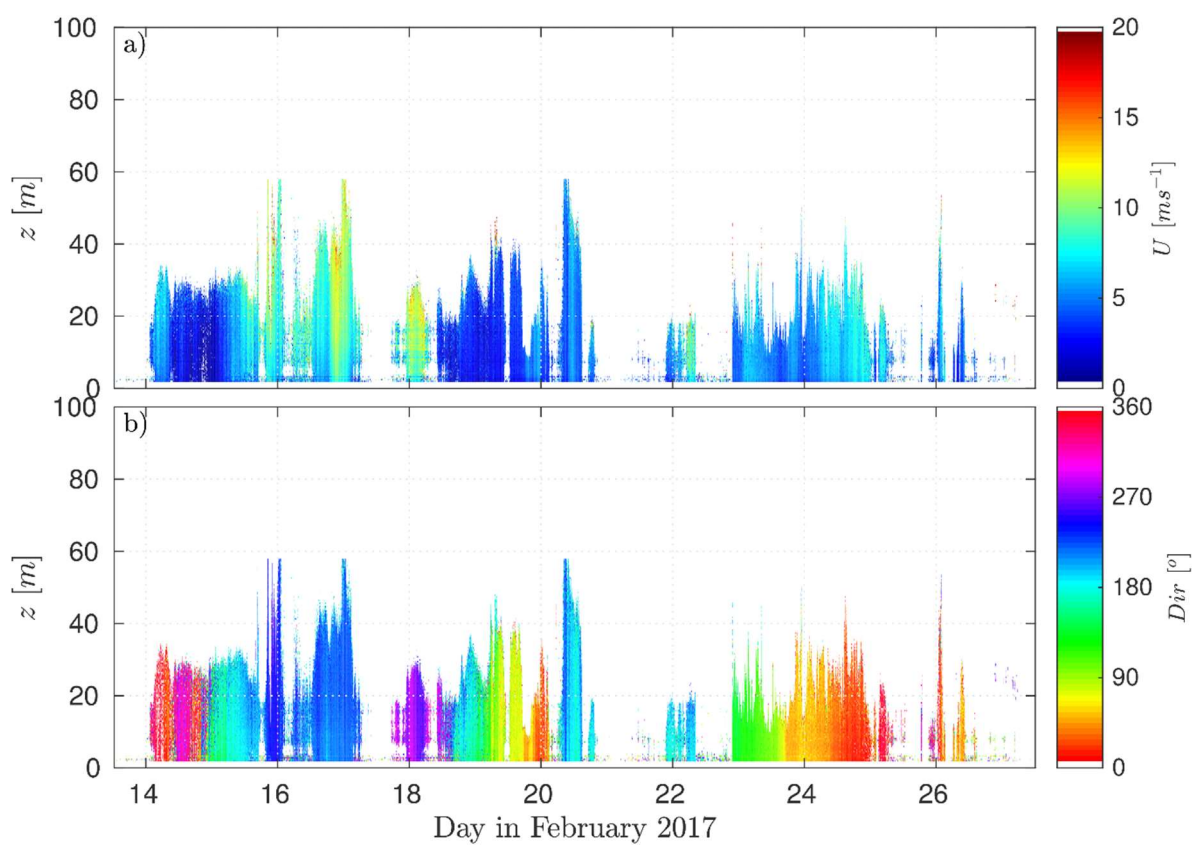

**Figure S2.** LIDAR profile time series of  $\bar{U}$  from 1 deg PPI scan.

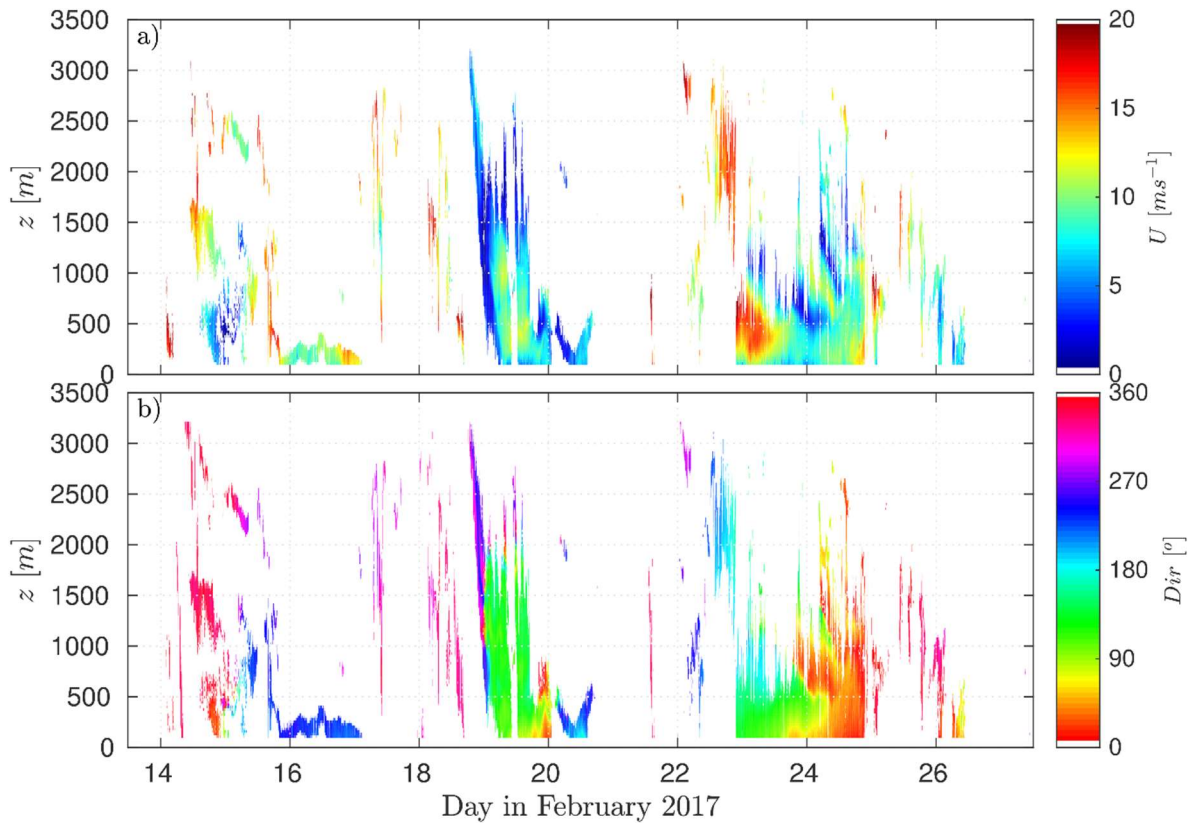

**Figure S3.** LIDAR profile time series of  $\bar{U}$  from 75 deg PPI scan.
